# Supplementary material for: The effect of the composition and pressure on the phase stability and electronic, magnetic, and elastic properties of M2AX (M = Mn, Fe; A = Al, Ga, Si, Ge; X = C, N) phases
Source: Royal Society of Chemistry journal article supplement (doi:10.1039/d1cp03427h), 2021-01-01
Supplement: d1cp03427h1.pdf [file d1cp03427h1.pdf]

We performed a convergence test to examine the effect of the k-points grid density on the calculated formation enthalpies  $H_{cp}$ . In VASP, the KSPACING parameter is responsible for the density of k-points. The value of 0.1 corresponds to the high k-point density; the value of 0.5 corresponds to the low k-point density.

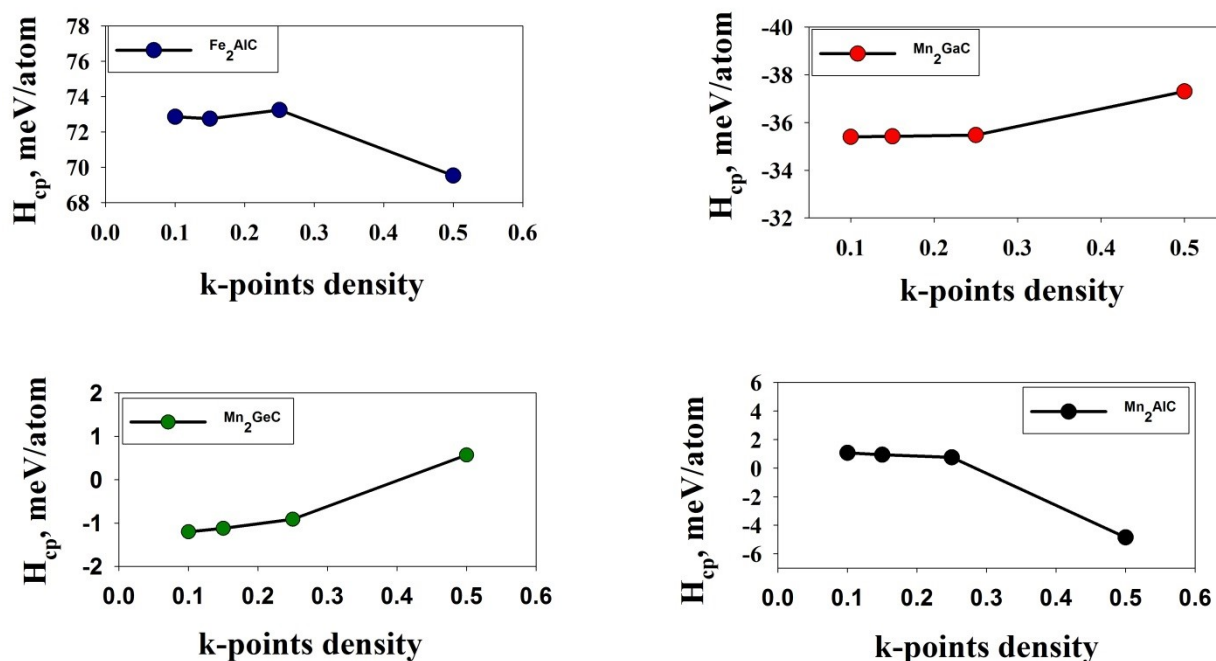

**Figure S1. Formation enthalpy  $H_{cp}$  as function of k-point density. 0.1 corresponds to the high k-point density, 0.5 corresponds to the low k-point density**

As one can see from Figure S1, an increase in the density of k-points leads to convergence of the results when the KSPACING parameter is higher than 0.2. Therefore, through all calculations, we used KSPACING = 0.15.
